# Supplementary material for: Vitamin D Receptor Genetic Variation and Cancer Biomarkers among Breast Cancer Patients Supplemented with Vitamin D3: A Single-Arm Non-Randomized Before and After Trial
Source: PubMed Central journal article supplement (PMC6628022; doi:10.3390/nu11061264), 2019-06-04
Supplement: nutrients-11-01264-s001.pdf [file nutrients-11-01264-s001.pdf]

**Figure S1.** Participants flowchart

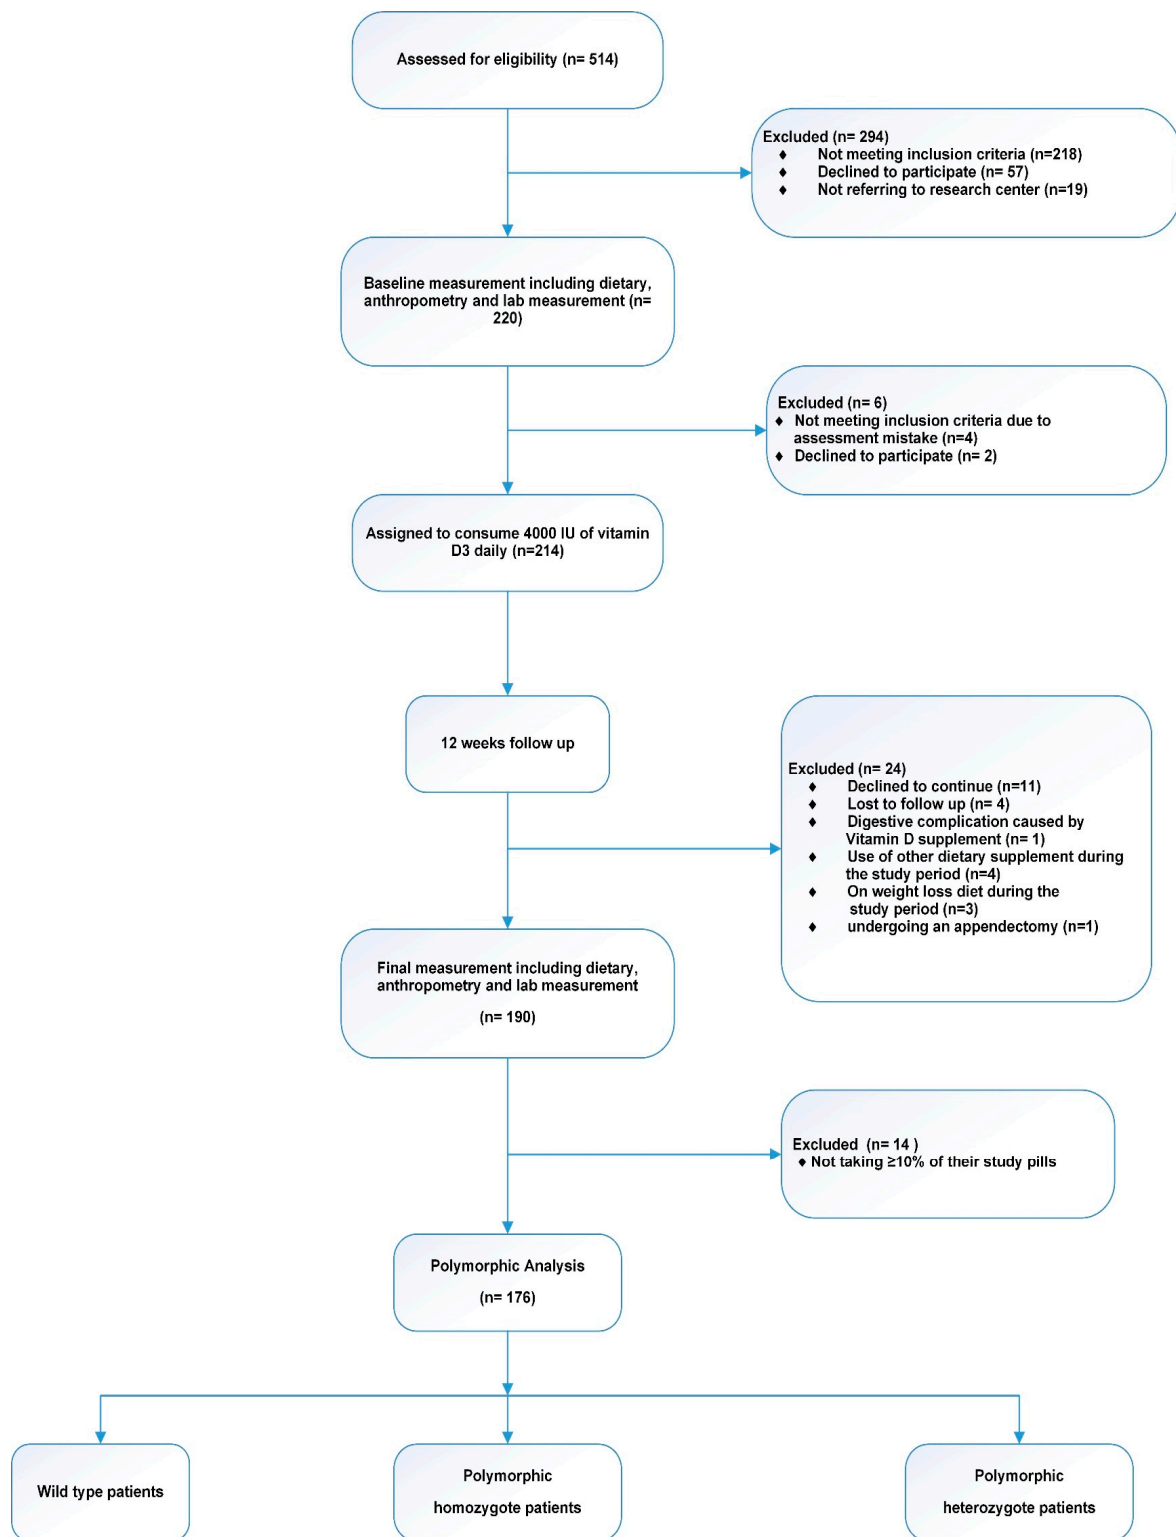

**Figure S2.** Graphical representation of changes in response variables before and after vitamin D3 supplementation (4000 IU/day) for 12 weeks.

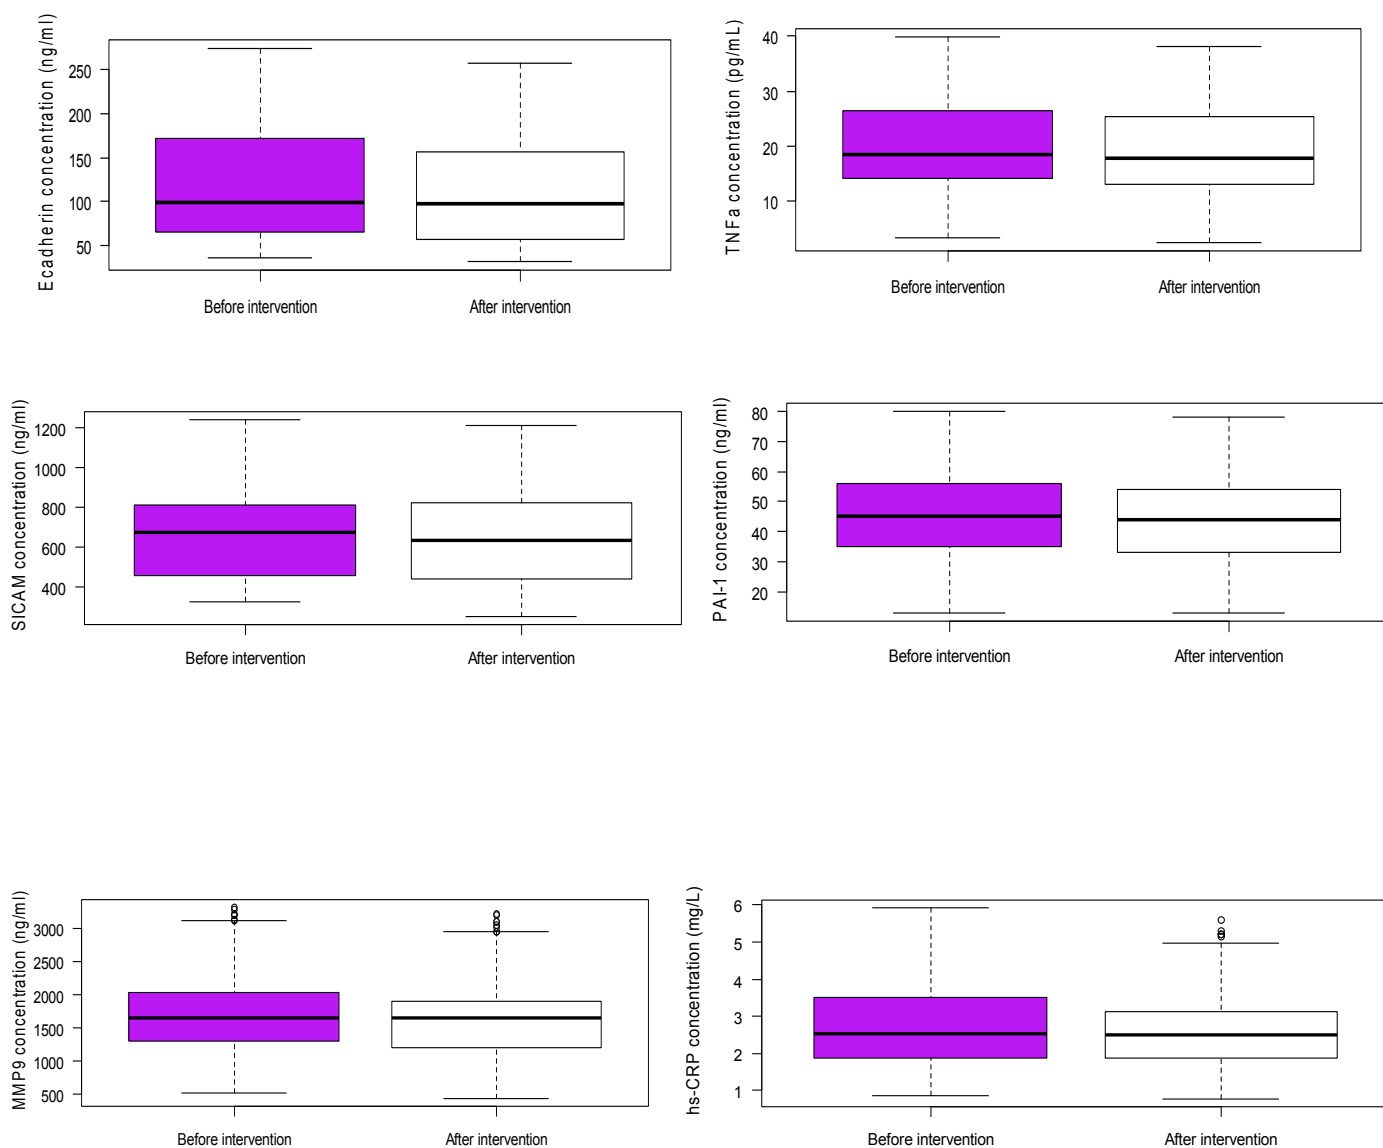

MMP9, matrix metalloproteinase 9;

SICAM-1, soluble intercellular adhesion molecule-1; TNF $\alpha$ , tumor necrosis factor $\alpha$ ; PAI-1, plasminogen activator inhibitor-1, hs-CRP, human high sensitivity C-reactive protein.

**Table S1.** Haplo.Score analysis of matrix metalloproteinase 9 (MMP9) changes after vitamin D supplementation (4000 IU/day) for 12 weeks

| Haplotypes                       |             |             |             |             |             | Hap-Freq | Hap-Score | P value* |
|----------------------------------|-------------|-------------|-------------|-------------|-------------|----------|-----------|----------|
| <i>Cdx-2 FokI BsmI ApaI TaqI</i> | <i>Cdx2</i> | <i>FokI</i> | <i>BsmI</i> | <i>ApaI</i> | <i>TaqI</i> |          |           | <0.001   |
| 1                                | G           | f           | b           | A           | t           | 0.021    | -2.97     | 0.002    |
| 2                                | G           | F           | b           | a           | T           | 0.045    | -2.05     | 0.03     |
| 3                                | G           | f           | b           | a           | T           | 0.023    | -1.93     | 0.05     |
| 4                                | G           | f           | b           | A           | T           | 0.032    | -1.81     | 0.06     |
| 5                                | G           | f           | B           | a           | T           | 0.044    | -1.65     | 0.09     |
| 6                                | G           | f           | B           | A           | T           | 0.058    | -1.27     | 0.20     |
| 7                                | G           | f           | B           | A           | t           | 0.080    | -1.12     | 0.25     |
| 8                                | G           | F           | B           | A           | t           | 0.063    | -1.10     | 0.26     |
| 9                                | G           | F           | B           | A           | T           | 0.139    | -0.77     | 0.43     |
| 10                               | G           | F           | b           | A           | T           | 0.059    | -0.63     | 0.52     |
| 11                               | G           | F           | B           | a           | t           | 0.038    | -0.59     | 0.55     |
| 12                               | G           | F           | b           | A           | t           | 0.065    | -0.34     | 0.72     |
| 13                               | G           | F           | B           | a           | T           | 0.059    | -0.33     | 0.74     |
| 14                               | A           | f           | B           | a           | T           | 0.022    | 0.93      | 0.35     |
| 15                               | A           | F           | b           | a           | T           | 0.023    | 1.30      | 0.19     |
| 16                               | A           | F           | B           | a           | T           | 0.041    | 2.09      | 0.035    |
| 17                               | A           | f           | b           | A           | T           | 0.027    | 2.11      | 0.03     |
| 18                               | A           | F           | B           | A           | t           | 0.034    | 4.03      | <0.001   |
| 19                               | A           | F           | B           | A           | T           | 0.073    | 4.31      | <0.001   |
| <i>Cdx2 FokI BsmI</i>            |             |             |             |             |             |          |           | 0.04     |
| 1                                | G           | f           | b           | -           | -           | 0.097    | -8.944    | <0.001   |
| 2                                | G           | F           | b           | -           | -           | 0.16     | -2.223    | 0.02     |
| 3                                | G           | f           | B           | -           | -           | 0.188    | -1.571    | 0.11     |
| 4                                | G           | F           | B           | -           | -           | 0.303    | -0.424    | 0.67     |
| 5                                | A           | f           | b           | -           | -           | 0.021    | 0.785     | 0.43     |
| 6                                | A           | f           | B           | -           | -           | 0.021    | 1.105     | 0.26     |
| 7                                | A           | F           | b           | -           | -           | 0.044    | 1.748     | 0.08     |

|                       |   |   |   |   |   |       |       |        |
|-----------------------|---|---|---|---|---|-------|-------|--------|
| 8                     | A | F | B | - | - | 0.162 | 3.483 | <0.001 |
| <i>FokI TaqI Cdx2</i> |   |   |   |   |   |       |       | <0.001 |
| 1                     | G | f | - | - | T | 0.17  | -2.78 | 0.005  |
| 2                     | G | f | - | - | t | 0.10  | -2.66 | 0.007  |
| 3                     | G | F | - | - | T | 0.28  | -2.13 | 0.03   |
| 4                     | G | F | - | - | t | 0.17  | -1.05 | 0.29   |
| 5                     | A | f | - | - | T | 0.04  | 2.36  | 0.01   |
| 6                     | A | F | - | - | t | 0.06  | 4.82  | <0.001 |
| 7                     | A | F | - | - | T | 0.14  | 5.10  | <0.001 |

\* P values were adjusted for age, baseline 25-hydroxy vitamin D (25(OH)D) and body mass index(BMI) and resulted from the false-discovery rate (FDR) methods.

Hap-Freq indicates the estimated frequency of the haplotype in the pool of all subjects.
